# Supplementary material
Source: publisher figshare collection journal article supplement (https://karger.figshare.com/ndownloader/files/18172760)
Supplement: Supplementary file 1 [file 18172760]

**HIGHLIGHTS**

- Correlate genotype with phenotype in a family with a novel *GLA* missense mutation, which leading to classical FD;
- The disease caused by p.N34D mutation affected men and women with similar course of the disease;
- p.N34D produces an unstable enzyme that is prematurely degraded in the endoplasmic reticulum, promoting *in vitro* residual activity of 4%;
- Although unstable, the enzyme is catalytically active, responding to treatment with pharmacological chaperone, promoting 37% of residual activity;
